# Supplementary material for: iMab antibody binds single-stranded cytosine-rich sequences and unfolds DNA i-motifs
Source: PubMed Central journal article supplement — Nucleic Acids Res. 2024 Jun 22;52(14):8052–62. doi: 10.1093/nar/gkae531 (PMC11317162; doi:10.1093/nar/gkae531), 2024-06-22
Supplement: gkae531_supplemental_file.pdf [file gkae531_supplemental_file.pdf]

# SUPPLEMENTARY INFORMATION

## IMAB ANTIBODY BINDS SINGLE-STRANDED CYTOSINE-RICH SEQUENCES AND UNFOLDS DNA I-MOTIFS

Joseph Boissieras,<sup>†</sup> Hugues Bonnet,<sup>†</sup> Maria Fidelia Susanto,  
Dennis Gomez, Eric Defrancq, Anton Granzhan,<sup>\*</sup> and Jérôme Dejeu<sup>\*</sup>

### Table of contents

#### ***Biolayer Interferometry (BLI) studies***

|                                                                                                                                                                                                            |         |
|------------------------------------------------------------------------------------------------------------------------------------------------------------------------------------------------------------|---------|
| <a href="#">Figure S1. BLI response during immobilization of hTeloC-27 at pH 6.0 and 7.5</a>                                                                                                               | S2      |
| <a href="#">Figure S2. BLI sensorgrams obtained for interaction of iMab scFv-His<sub>6</sub>-FLAG with hTeloC at pH 6.0 and pH 7.5</a>                                                                     | S2      |
| <a href="#">Figure S3. BLI sensorgrams obtained for interaction of iMab with hTeloC-27 and the constrained system (1)</a>                                                                                  | S2      |
| <a href="#">Figures S4–S7. BLI sensorgrams obtained for interaction of iMab with various variants of hTeloC sequence</a>                                                                                   | S3–S10  |
| <a href="#">Figures S8–S9. BLI sensorgrams obtained for interaction of iMab with hp-ATT and ss-DNA</a>                                                                                                     | S11–S12 |
| <a href="#">Table S1. Oligonucleotide sequences and the corresponding <math>K_D</math> values for the two variants of iMab at pH 6.0 and 7.5</a>                                                           | S13     |
| <a href="#">Figure S10. BLI sensorgrams obtained after dipping in ammonia solution</a>                                                                                                                     | S14     |
| <a href="#">Table S2. Kinetic and thermodynamic constants for interaction of iMab (scFv-His<sub>6</sub>) with the different HTeloC substrates at pH 6 prior to and after dipping into ammonia solution</a> | S15     |

#### ***Circular dichroism (CD) and gel electrophoresis studies***

|                                                                                                                  |     |
|------------------------------------------------------------------------------------------------------------------|-----|
| <a href="#">Figure S11. pH titration (A) and CD spectra of hTeloC-27 at pH 6.0, 6.5 and pH 7.5 (B)</a>           | S16 |
| <a href="#">Figure S12. CD spectra of various variants of hTeloC sequence</a>                                    | S17 |
| <a href="#">Figure S13. Native gel electrophoresis of hTeloC-2x6T and hTeloC-3x4 at different concentrations</a> | S18 |

#### ***Bulk-FRET experiments***

|                                                                                                                                                |     |
|------------------------------------------------------------------------------------------------------------------------------------------------|-----|
| <a href="#">Figure S14. CD and fluorescence emission spectra of the substrates used in bulk-FRET experiments at pH 5.5 and 7.5</a>             | S19 |
| <a href="#">Figure S15. Time-dependent variation of fluorescence emission spectra of Cy3-Py25/Cy5-CS after addition of recombinant hnRNP K</a> | S19 |
| <a href="#">Figure S16. Fluorescence emission spectra of Cy3-Py25 and Cy5-CS in the absence and in the presence of iMab</a>                    | S20 |

## Biolayer interferometry (BLI) studies

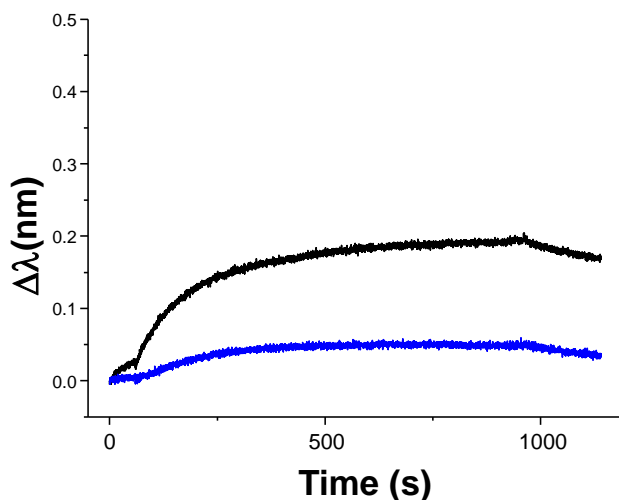

**Figure S1.** BLI signals observed during immobilization of hTeloC-27 at pH 6.0 (black) and 7.5 (blue).

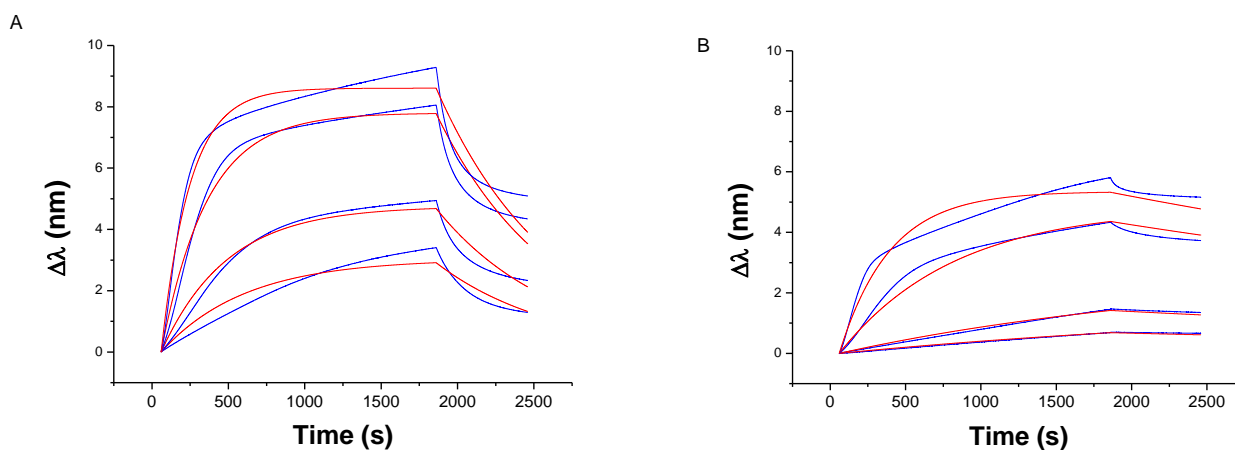

**Figure S2.** BLI analysis of binding of different concentrations of iMab scFv-His<sub>6</sub>-FLAG (62.5, 125, 250 and 500 nM) to hTeloC-27 at pH 6.0 (A) and pH 7.5 (B). Blue lines are experimental curves; red lines are the fits to the 1:1 model.

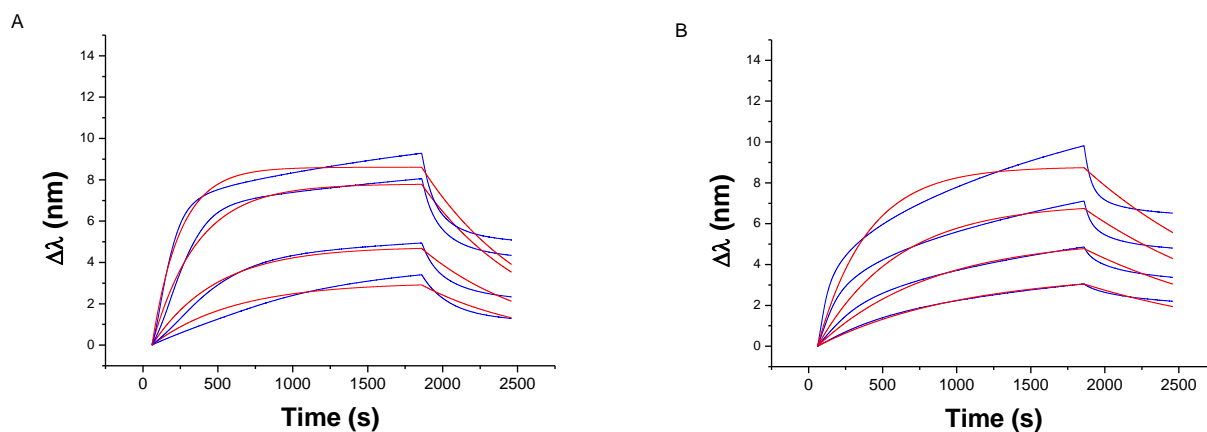

**Figure S3.** BLI analysis of binding of different concentrations of iMab scFv-His<sub>6</sub>-FLAG (62.5, 125, 250 and 500 nM) to hTeloC-27 (A) and constrained hTeloC 1 (B) at pH 6.5. Blue lines are experimental curves; red lines are the fits to the 1:1 model.

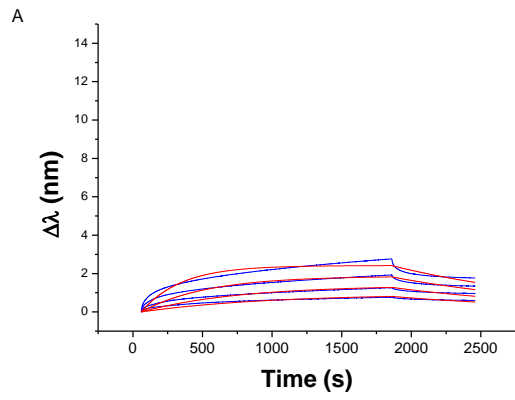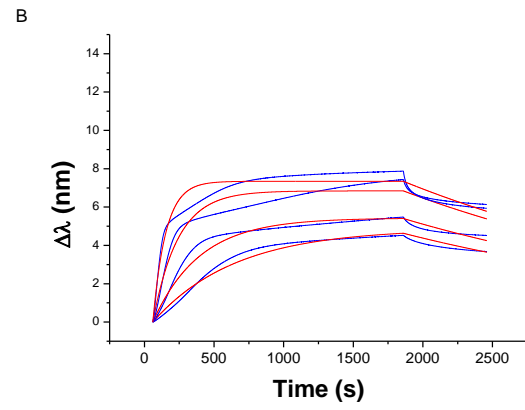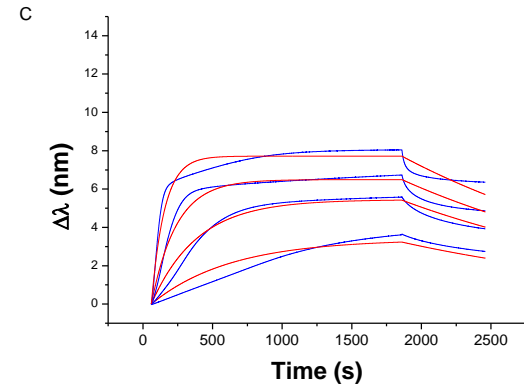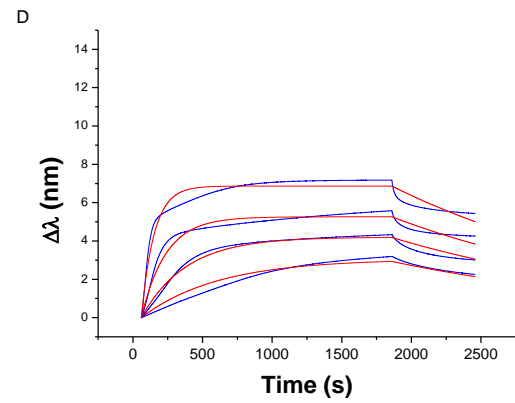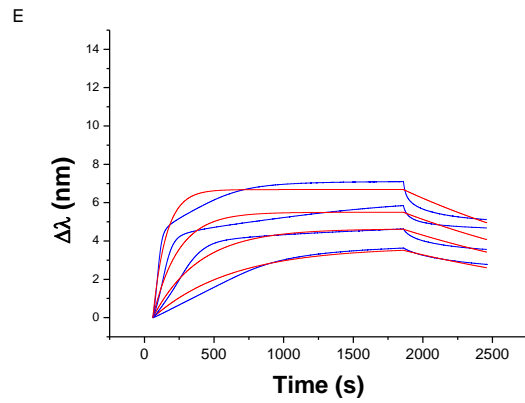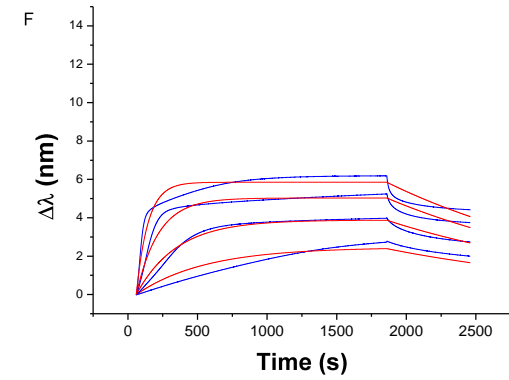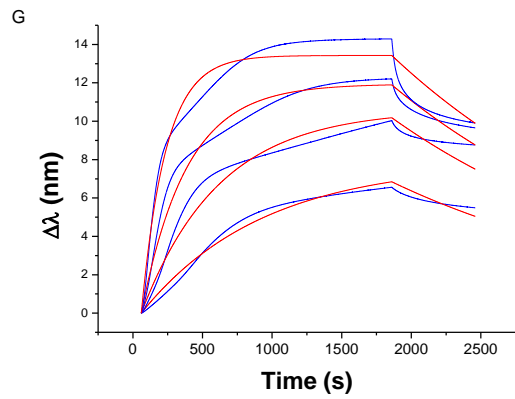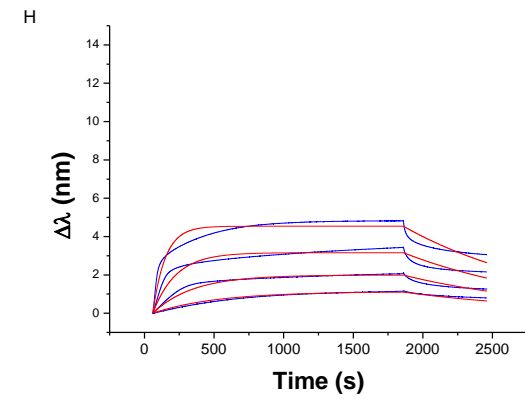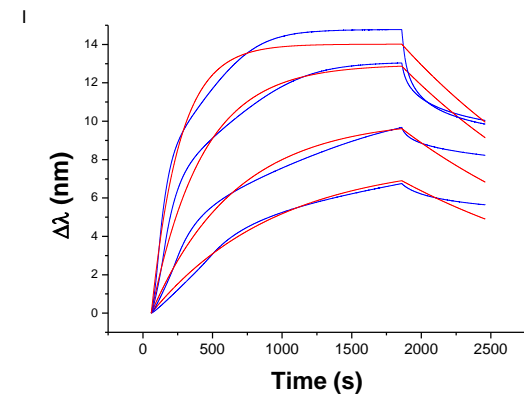

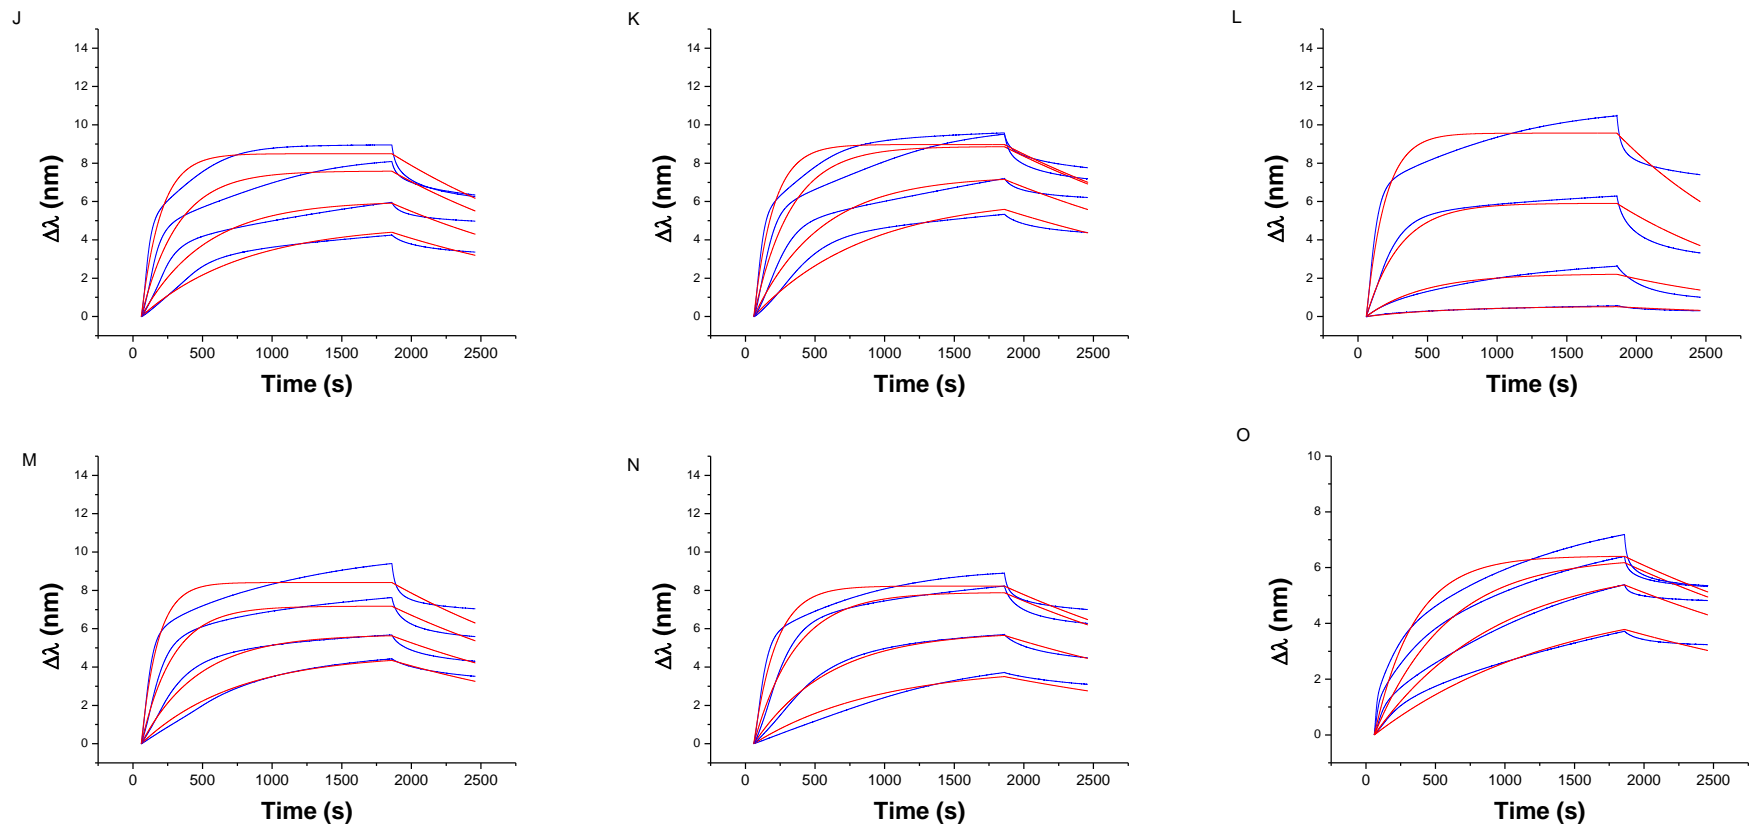

**Figure S4.** BLI analysis of binding of different concentrations of iMab scFv-His<sub>6</sub>-FLAG (62.5, 125, 250 and 500 nM) to hTeloC-4x5 (**A**), hTeloC-3x4 (**B**), hTeloC 3x3 (**C**), hTeloC 3x2 (**D**), hTeloC 2x3 (**E**), hTeloC 2x3T (**F**), hTeloC-2x2 (**G**), hTeloC 1x3T (**H**), hTeloC-1x2T (**I**), hTeloC 1x6 T (**J**), hTeloC 2x6T (**K**), hTeloC-scr (**L**), hTeloC-Mut (**M**), hTeloC X3 (**N**) and hTeloC-22 (**O**) at pH 6.0. Blue lines are experimental curves; red lines are the fits to the 1:1 model.

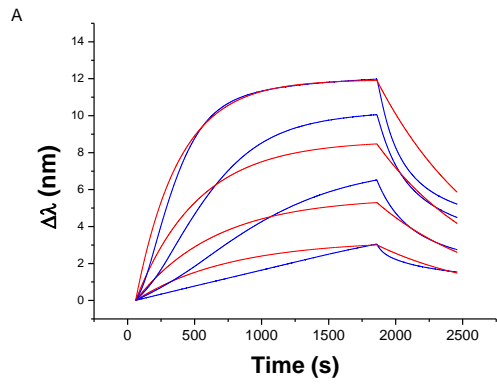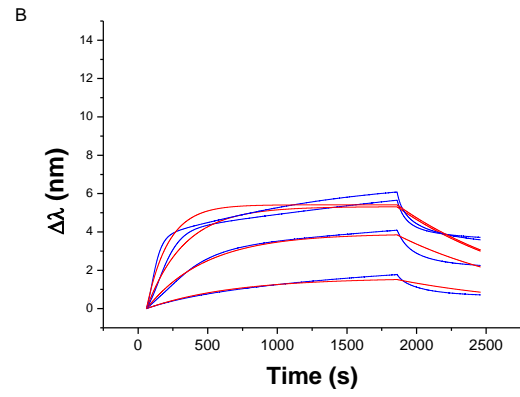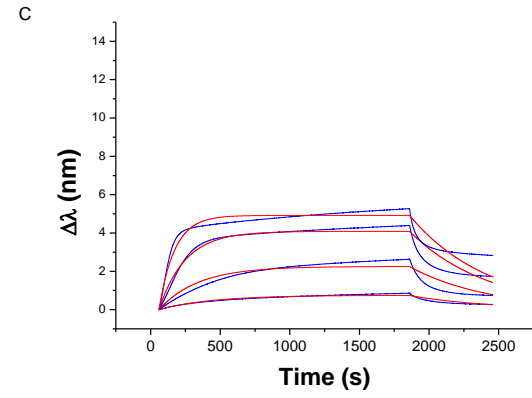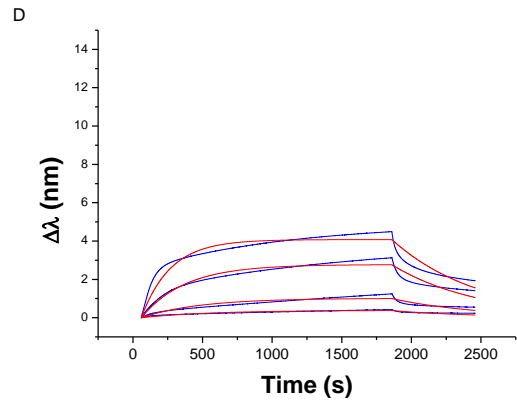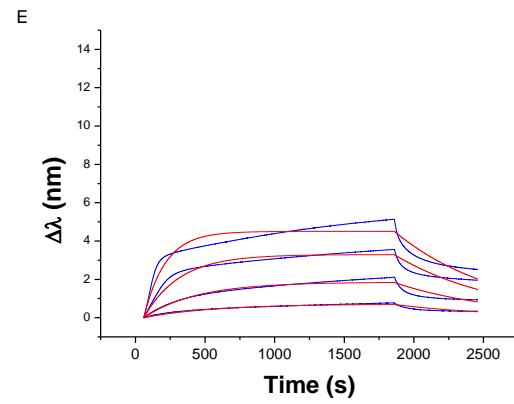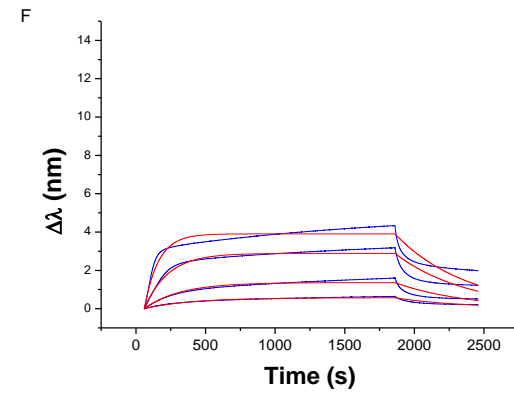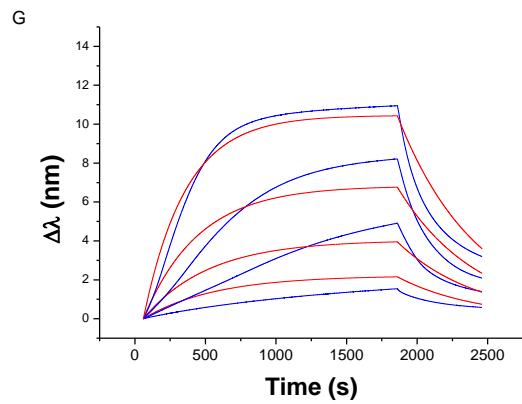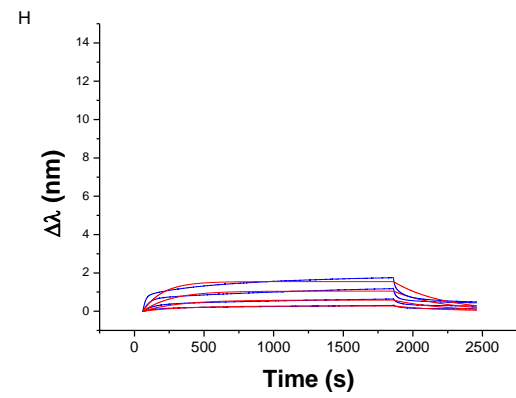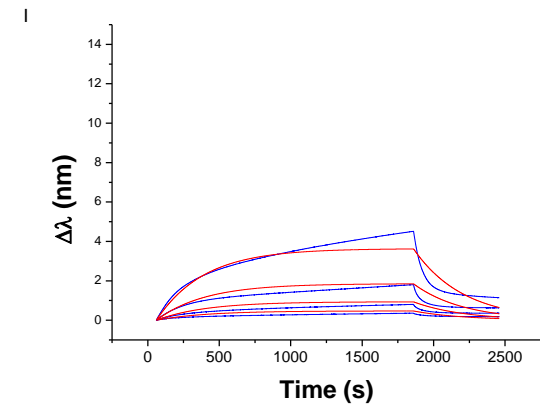

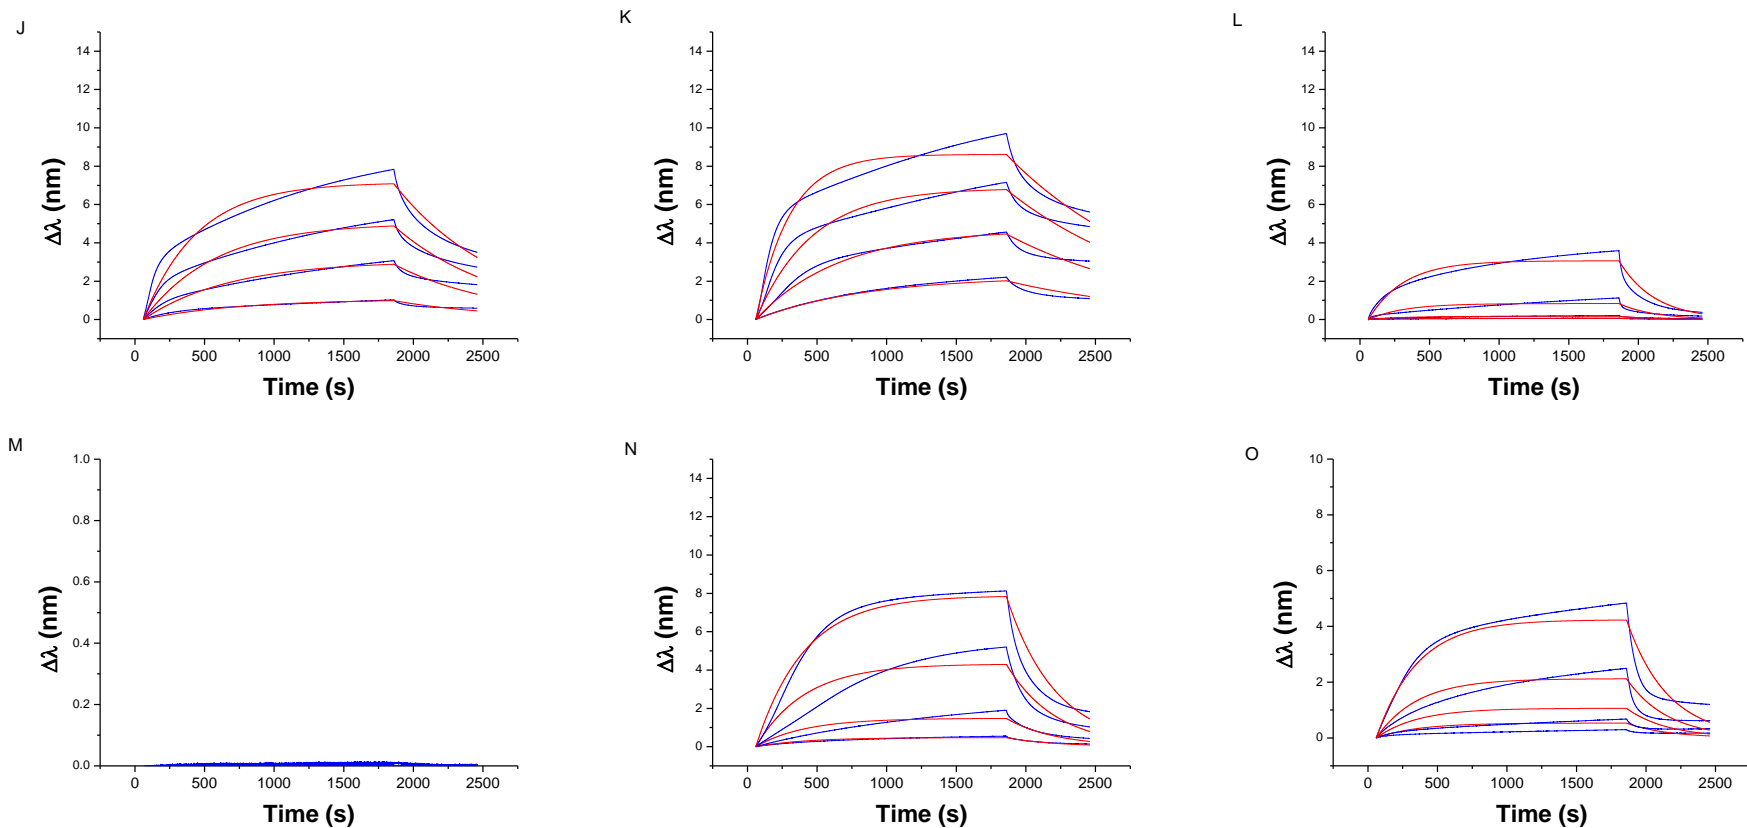

**Figure S5.** BLI analysis of binding of different concentrations of iMab scFv-His<sub>6</sub>-FLAG (62.5, 125, 250 and 500 nM) to hTeloC-4x5 (**A**), hTeloC-3x4 (**B**), hTeloC 3x3 (**C**), hTeloC 3x2 (**D**), hTeloC 2x3 (**E**), hTeloC 2x3T (**F**), hTeloC-2x2 (**G**), hTeloC 1x3T (**H**), hTeloC-1x2T (**I**), hTeloC 1x6 T (**J**), hTeloC 2x6T (**K**), hTeloC-scr (**L**), hTeloC-Mut (**M**), hTeloC-X3 (**N**) and hTeloC-22 (**O**) at pH 7.5. Blue lines are experimental curves; red lines are the fits to the 1:1 model.

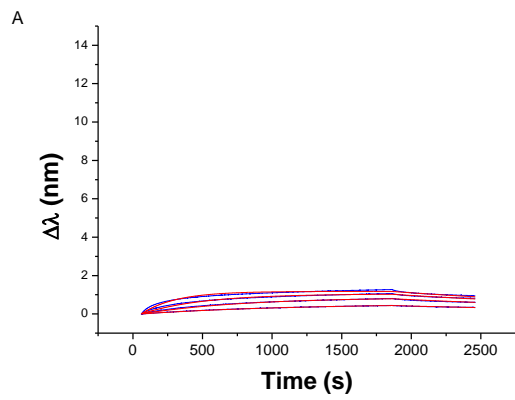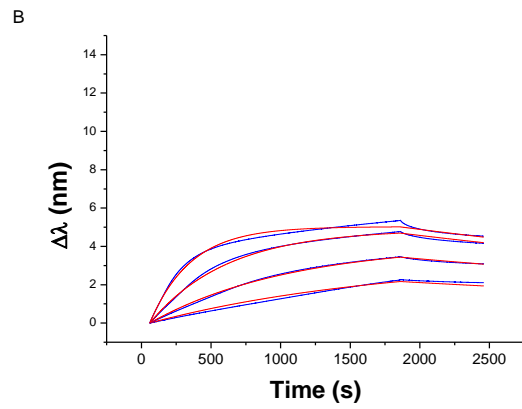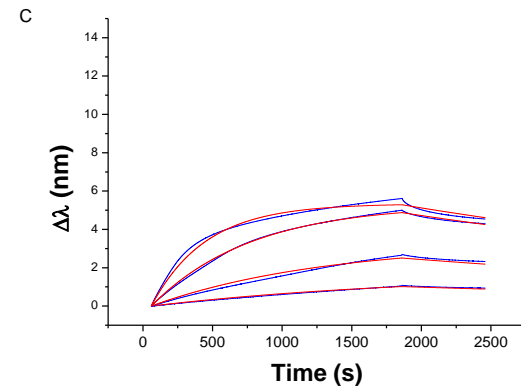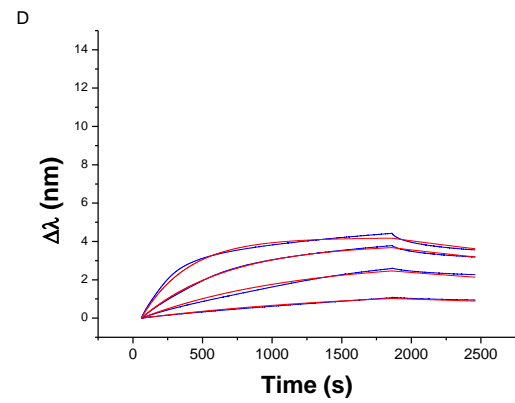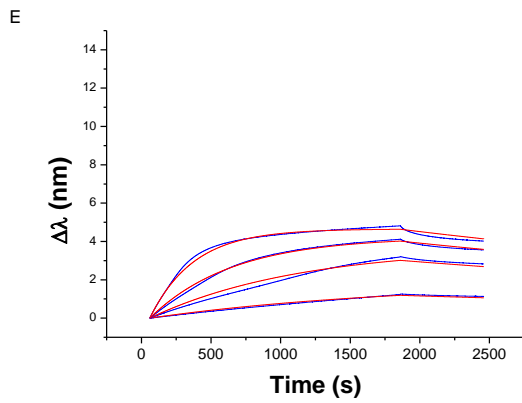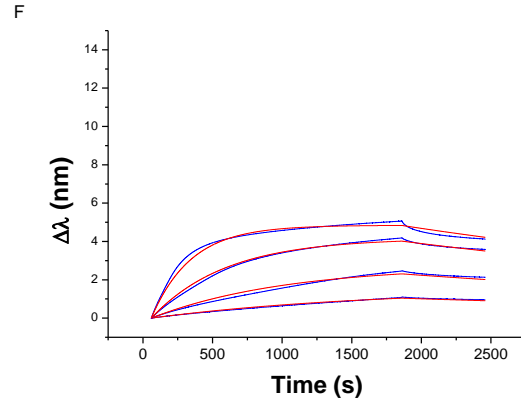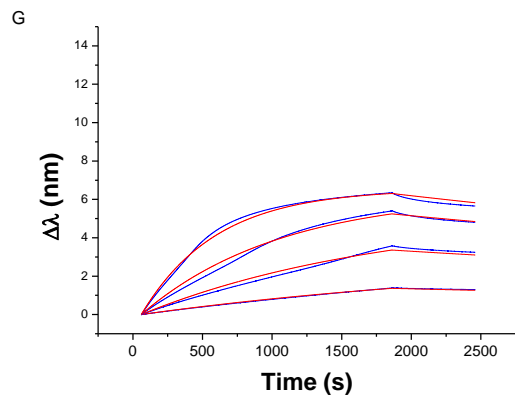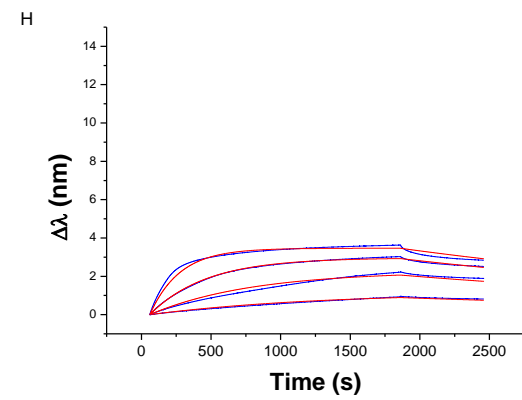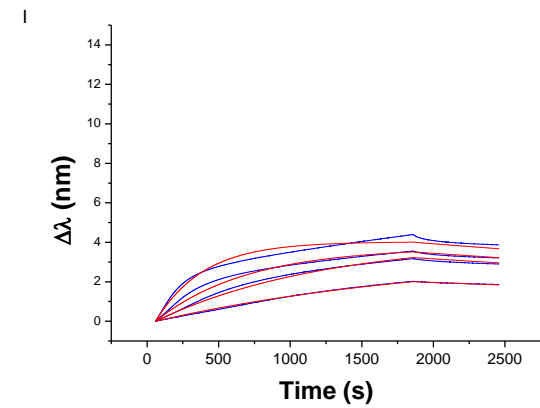

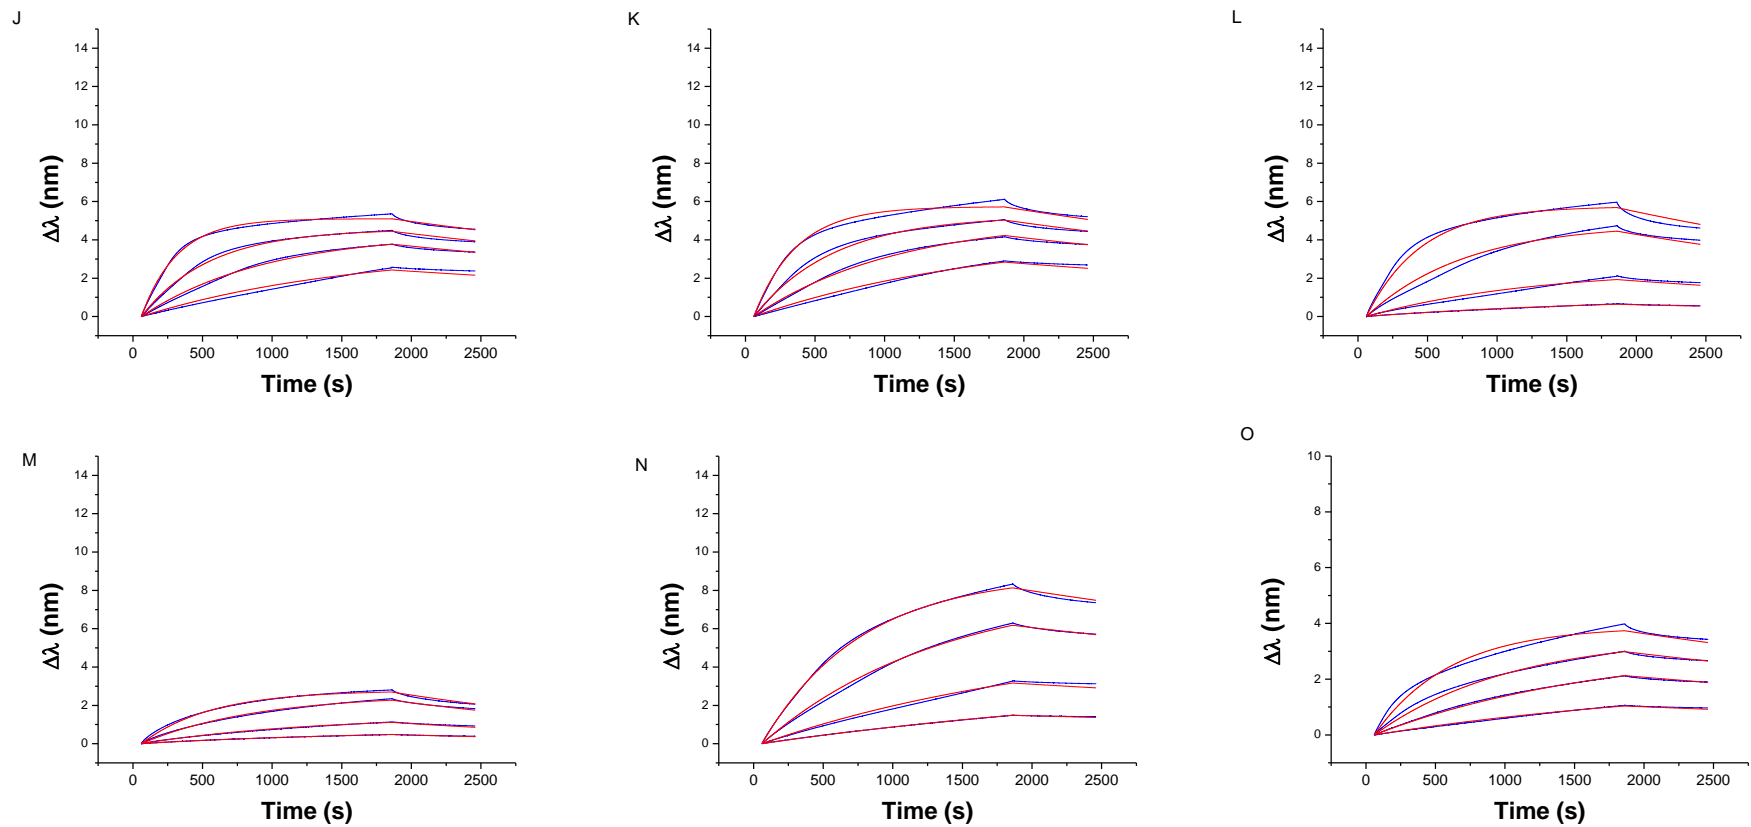

**Figure S6.** BLI analysis of binding of different concentrations of iMab scFv-His<sub>6</sub> (62.5, 125, 250 and 500 nM) to hTeloC-4x5 (**A**), hTeloC-3x4 (**B**), hTeloC 3x3 (**C**), hTeloC 3x2 (**D**), hTeloC 2x3 (**E**), hTeloC 2x3T (**F**), hTeloC-2x2 (**G**), hTeloC 1x3T (**H**), hTeloC-1x2T (**I**), hTeloC 1x6 T (**J**), hTeloC 2x6T (**K**), hTeloC-scr (**L**), hTeloC-Mut (**M**), hTeloC-X3 (**N**) and hTeloC-22 (**O**) at pH 6.0. Blue lines are experimental curves; red lines are the fits to the 1:1 model.. Blue lines are experimental curves; red lines are the fits to the 1:1 model.



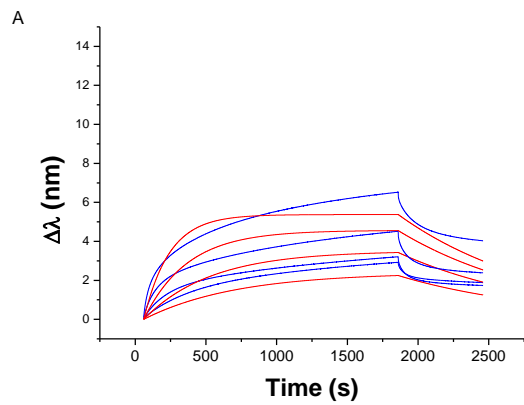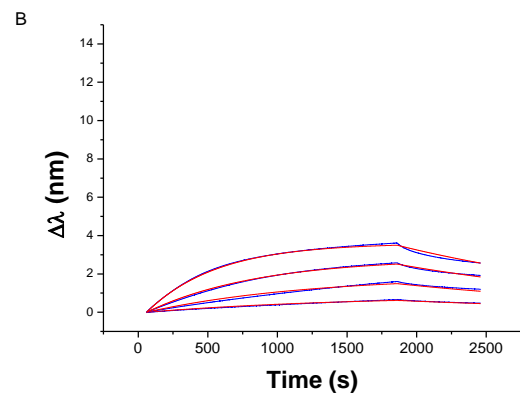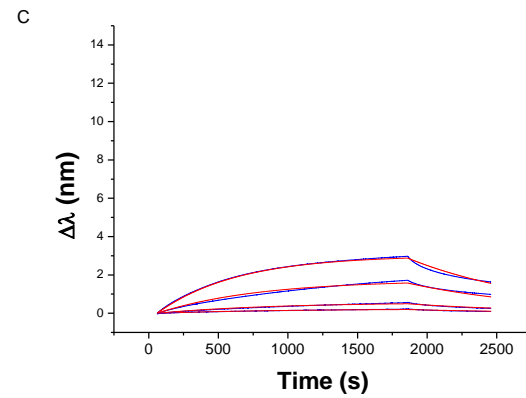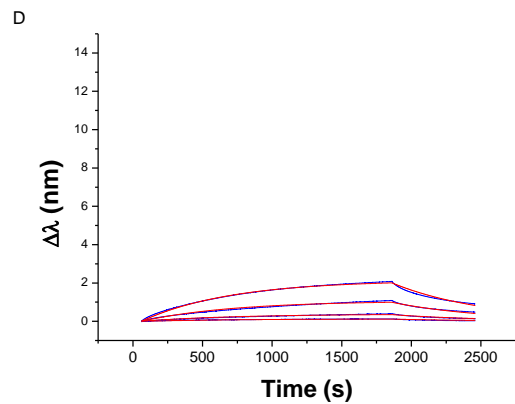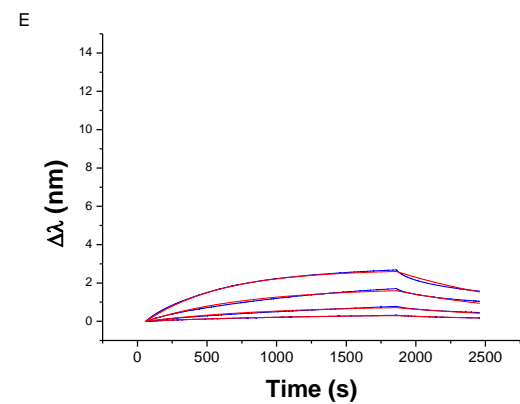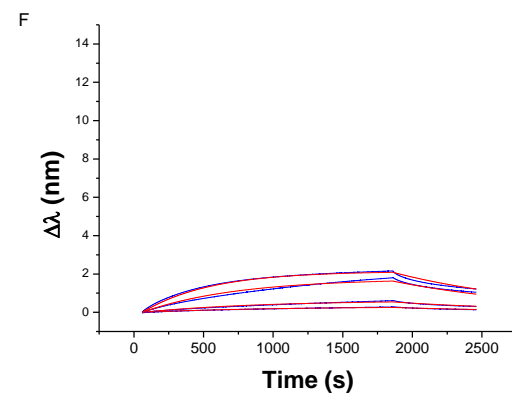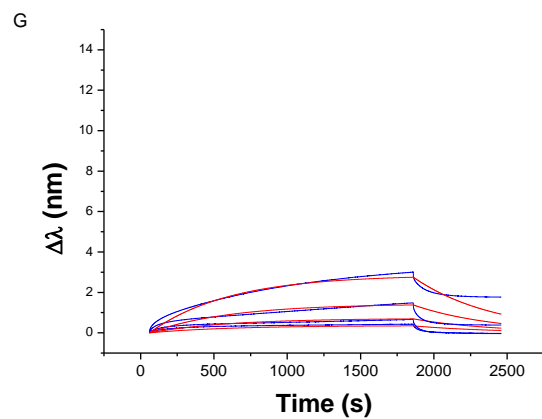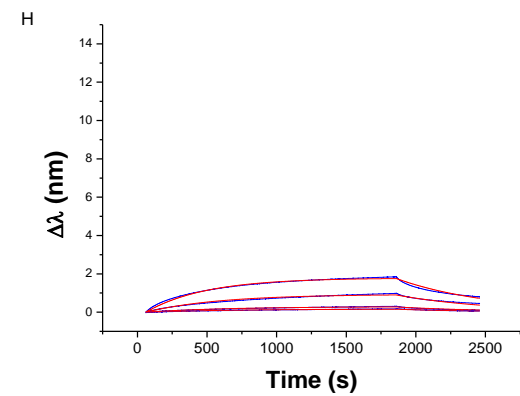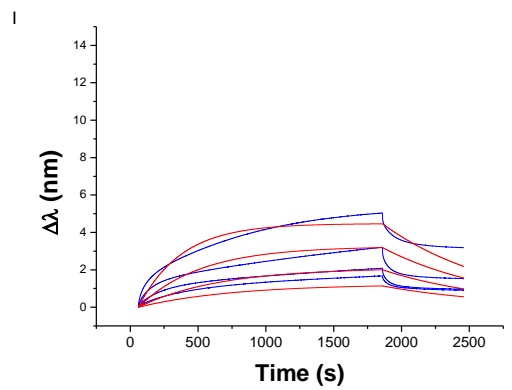

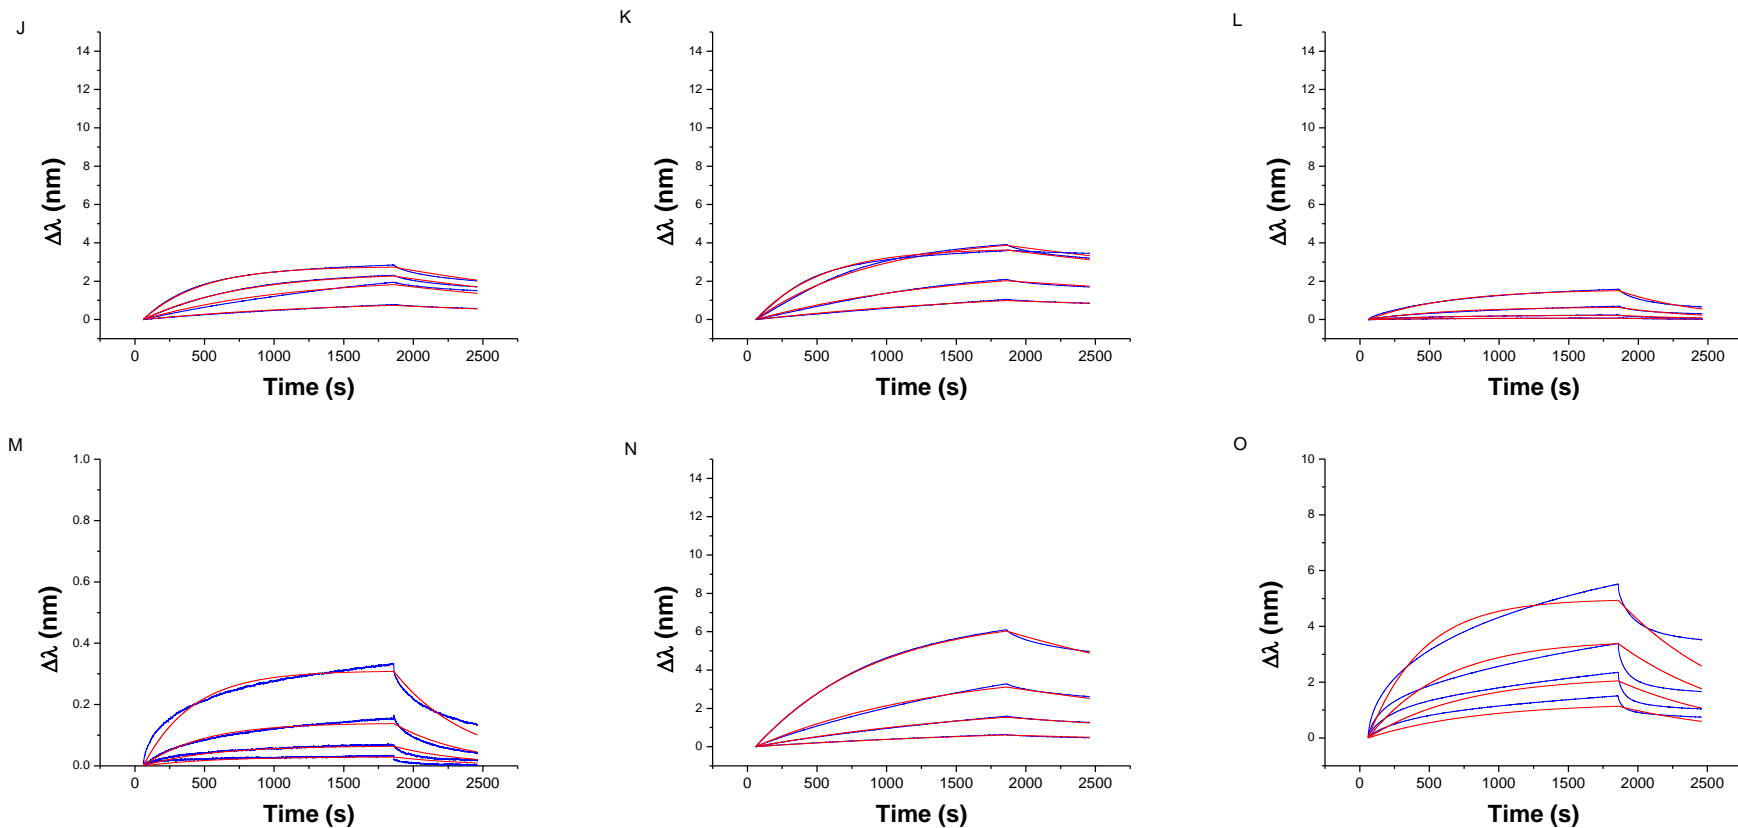

**Figure S7.** BLI analysis of binding of different concentrations of iMab scFv-His<sub>6</sub> (62.5, 125, 250 and 500 nM) to hTeloC-4x5 (**A**), hTeloC-3x4 (**B**), hTeloC 3x3 (**C**), hTeloC 3x2 (**D**), hTeloC 2x3 (**E**), hTeloC 2x3T (**F**), hTeloC-2x2 (**G**), hTeloC 1x3T (**H**), hTeloC-1x2T (**I**), hTeloC 1x6 T (**J**), hTeloC 2x6T (**K**), hTeloC-scr (**L**), hTeloC-Mut (**M**), hTeloC-X3 (**N**) and hTeloC-22 (**O**) at pH 7.5. Blue lines are experimental curves; red lines are the fits to the 1:1 model.

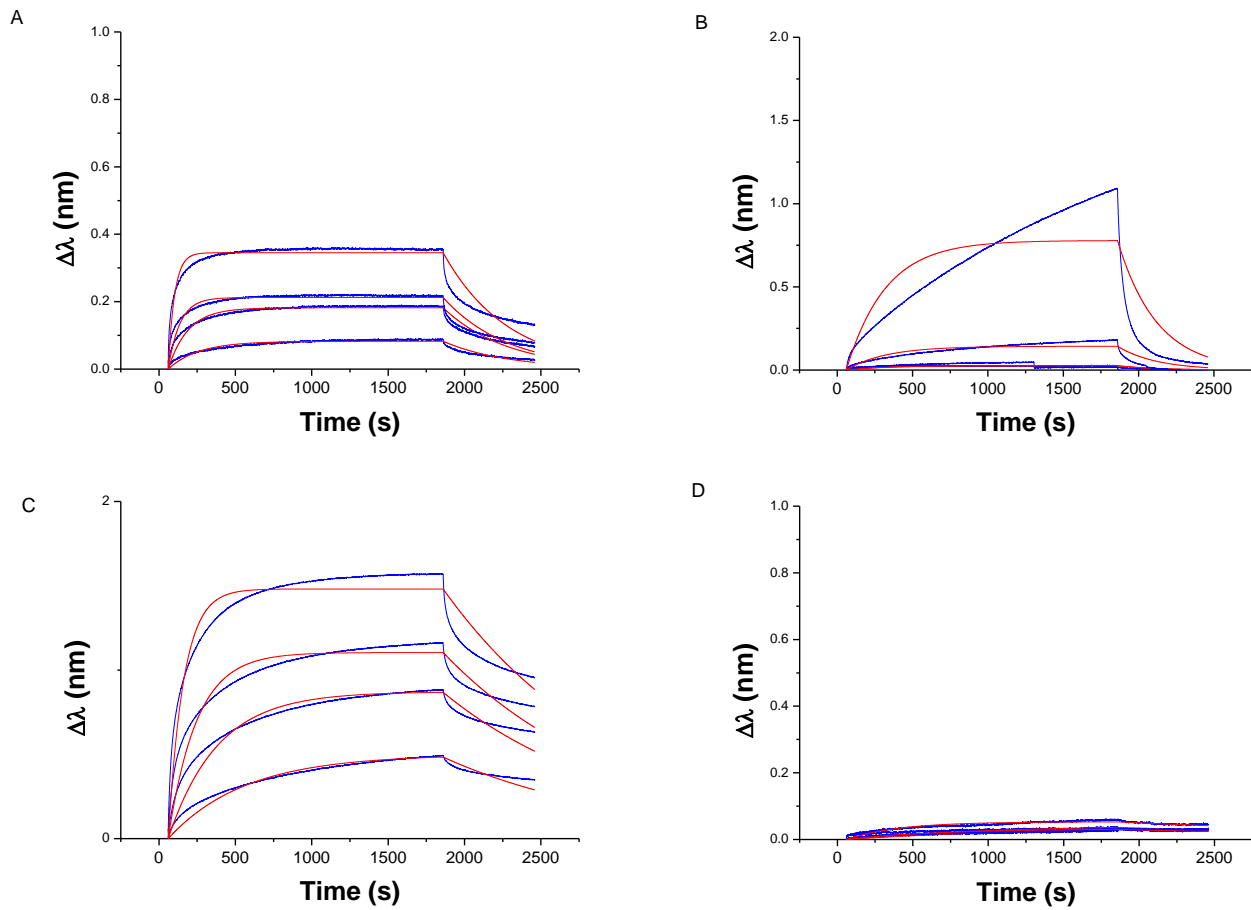

**Figure S8.** Bio-layer interferometry (BLI) analysis of binding of different concentrations of iMab scFv-His<sub>6</sub>-FLAG at pH 6 (**A** and **C**) and 7.5 (**B** and **D**) for hp-ATT (**A-B**) and ss-DNA (**C-D**). The red lines are the fitting of the experiment. Concentration range: 62.5, 125, 250 and 500 nM.

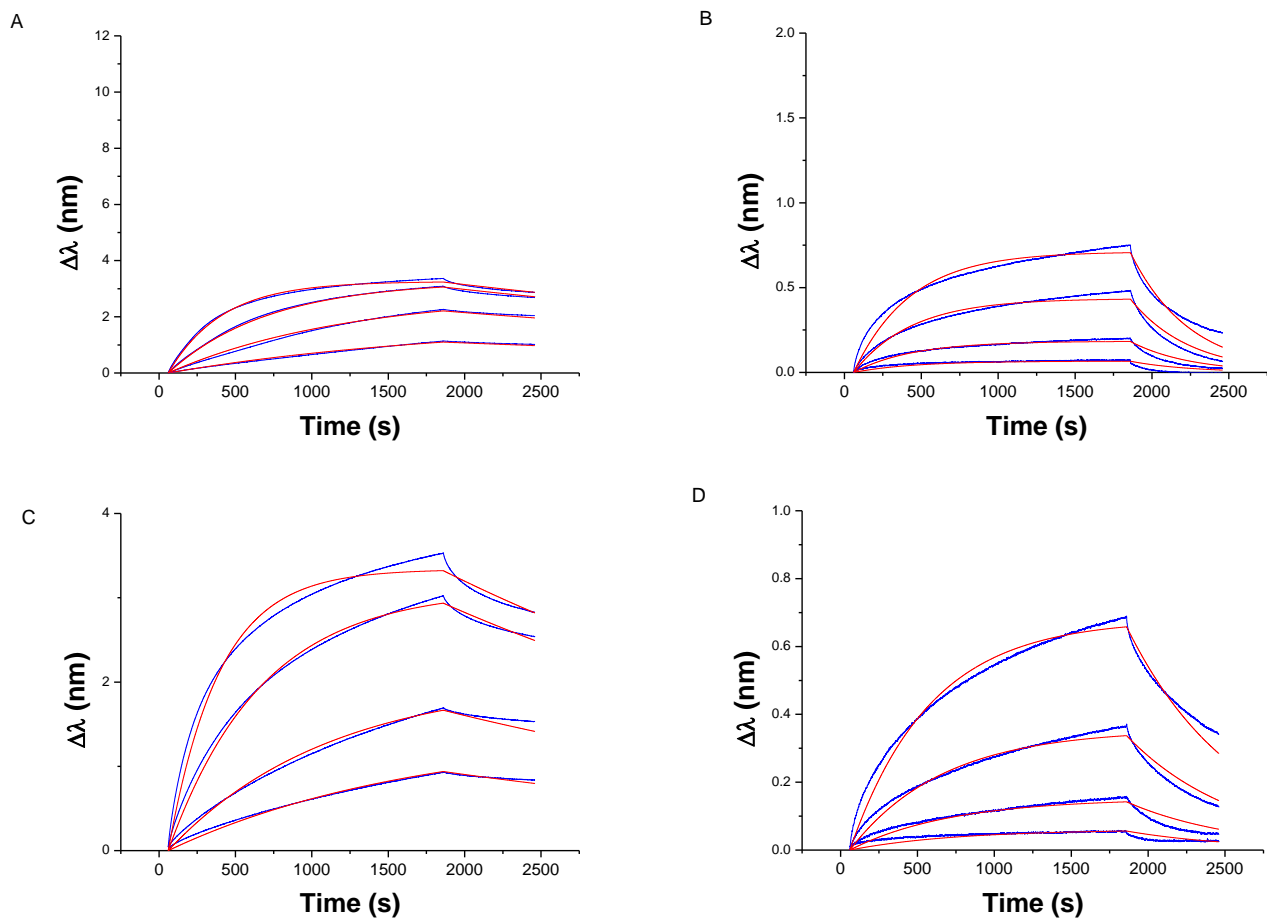

**Figure S9.** Bio-layer interferometry (BLI) analysis of binding of different concentrations of iMab scFv-His<sub>6</sub> at pH 6 (**A** and **C**) and 7.5 (**B** and **D**) for hp-ATT (**A-B**) and ss-DNA (**C-D**). The red lines are the fitting of the experiment. Concentration range: 62.5, 125, 250 and 500 nM.

**Table S1.** Oligonucleotide sequences used in this study and the corresponding  $K_D$  values for the two variants of iMab, obtained from BLI experiments at pH 6.0 or 7.5 and 20 °C.<sup>a</sup>

| Acronym     | Sequence (5'→3')                       | iM folding, <sup>a</sup> at pH: |     | number of C / length (nt) | $K_D$ at pH 6.0 (nM)  |                             | $K_D$ at pH 7.5 (nM)  |                             |
|-------------|----------------------------------------|---------------------------------|-----|---------------------------|-----------------------|-----------------------------|-----------------------|-----------------------------|
|             |                                        | 6.0                             | 7.5 |                           | scFv-His <sub>6</sub> | scFv-His <sub>6</sub> -FLAG | scFv-His <sub>6</sub> | scFv-His <sub>6</sub> -FLAG |
| hTeloC-4x5  | <b>TCCCCCTCCCCCTACCCCTCCCCCTA</b>      | +                               | –   | 20 / 27                   | 63 (50; 75)           | 137 (112; 162)              | 102 (80; 128)         | 22 (15; 28)                 |
| hTeloC-27   | <b>TAACCCCTAACCCCTAACCCCTAA</b>        | +                               | –   | 12 / 27                   | 34 (24; 44)           | 28 (23; 31)                 | 108 (63; 153)         | 91 (18; 164)                |
| hTeloC-3x4  | <b>TAATAACCCCTAACCCCTAACCCCTAA</b>     | +                               | –   | 12 / 27                   | 29 (17; 41)           | 22 (18; 26)                 | 178 (135; 221)        | 138 (67; 209)               |
| hTeloC-2x6T | <b>TTTTAACCCCTAACCCCTAATTT</b>         | +                               | –   | 12 / 27                   | 65 (54; 76)           | 31 (31; 31)                 | 67 (48; 86)           | 170 (118; 222)              |
| hTeloC-scr  | <b>TACACTCACACTCACACTCACACTCAA</b>     | –                               | –   | 12 / 27                   | 62 (50; 74)           | 57 (53; 61)                 | n.b. <sup>c</sup>     | n.b.                        |
| hTeloC-3x3  | <b>TAATAATAACCCCTAACCCCTAACCCCTAA</b>  | – <sup>d</sup>                  | –   | 9 / 27                    | 49 (31; 67)           | 27 (24; 30)                 | 716 (466; 966)        | 325 (205; 445)              |
| hTeloC-3x2  | <b>TAATAACCTAACCTAACCTAATAATAA</b>     | –                               | –   | 6 / 27                    | 43 (16; 70)           | 30 (25; 35)                 | n.b.                  | n.b.                        |
| hTeloC-2x3  | <b>TAATAATAACCCCTAACCCCTAATAATAA</b>   | –                               | –   | 6 / 27                    | 32 (22; 42)           | 30 (24; 36)                 | 475 (438; 512)        | 195 (109; 281)              |
| hTeloC-2x3T | <b>TTTTTTTAAACCCCTAACCCCTAATTTTTT</b>  | –                               | –   | 6 / 27                    | 35 (27; 43)           | 30 (26; 34)                 | 396 (206; 586)        | 241 (148; 334)              |
| hTeloC-1x6T | <b>TTTTTTTTTAAACCCCTAATTTTTTTT</b>     | –                               | –   | 6 / 27                    | 27 (23; 31)           | 47 (38; 56)                 | 125 (113; 137)        | 493 (468; 518)              |
| hTeloC-2x2  | <b>TAATAACCTAATCTAACCTAATAATAA</b>     | –                               | –   | 5 / 27                    | 40 (30; 50)           | 50 (35; 65)                 | n.b. <sup>c</sup>     | 58 (40; 76)                 |
| hTeloC-1x3T | <b>TTTTTTTTTTTAAACCCCTAATTTTTTTTTT</b> | –                               | –   | 3 / 27                    | 33 (25; 41)           | 60 (38; 82)                 | 891 (408; 1374)       | 346 (338; 354)              |
| hTeloC-1x2T | <b>TTTTTTTTTTTAAACCTAATTTTTTTTTT</b>   | –                               | –   | 2 / 27                    | 26 (12; 40)           | 65 (43; 87)                 | 303 (252; 354)        | 108 (62; 154)               |
| hTeloC-22   | <b>CCCTAACCCCTAACCCCTAACCCCT</b>       | +                               | –   | 12 / 22                   | 62 (58; 66)           | 61 (55; 66)                 | 250 (100; 400)        | 45 (10; 80)                 |
| hTeloC-mut  | <b>CGGTAACGGTAACGGTAACGGT</b>          | –                               | –   | 4 / 22                    | 141 (117; 165)        | 169 (102; 236)              | n.b. <sup>c</sup>     | n.b.                        |
| hTeloC-X3   | <b>CCCTAACCCCTAACCCCTAA</b>            | – <sup>d</sup>                  | –   | 9 / 18                    | 54 (35; 73)           | 20 (8; 32)                  | 215 (170; 260)        | 396 (272; 520)              |
| hp-ATT      | <b>GCGCGCGCATTGCGCGCGC</b>             | –                               | –   | 8 / 19                    | 38 (23; 53)           | 26 (8; 44)                  | n.b.                  | n.b.                        |
| ss-DNA      | <b>GGCATAGTGCGTGGGCG</b>               | –                               | –   | 3 / 17                    | 50 (27; 73)           | 43 (24; 62)                 | n.b.                  | n.b.                        |

<sup>a</sup> Data are means  $\pm$  s.d. from  $N = 2$  independent measurements. <sup>b</sup> according to CD spectra (cf. [Supplementary Figure S12](#)). <sup>c</sup> n.b. = Not determined, due to weak BLI signals (no binding) or uncoherent value obtained during the fitting ( $R_{\max}$  too high). <sup>d</sup> partial iM formation was observed at pH 5.5.

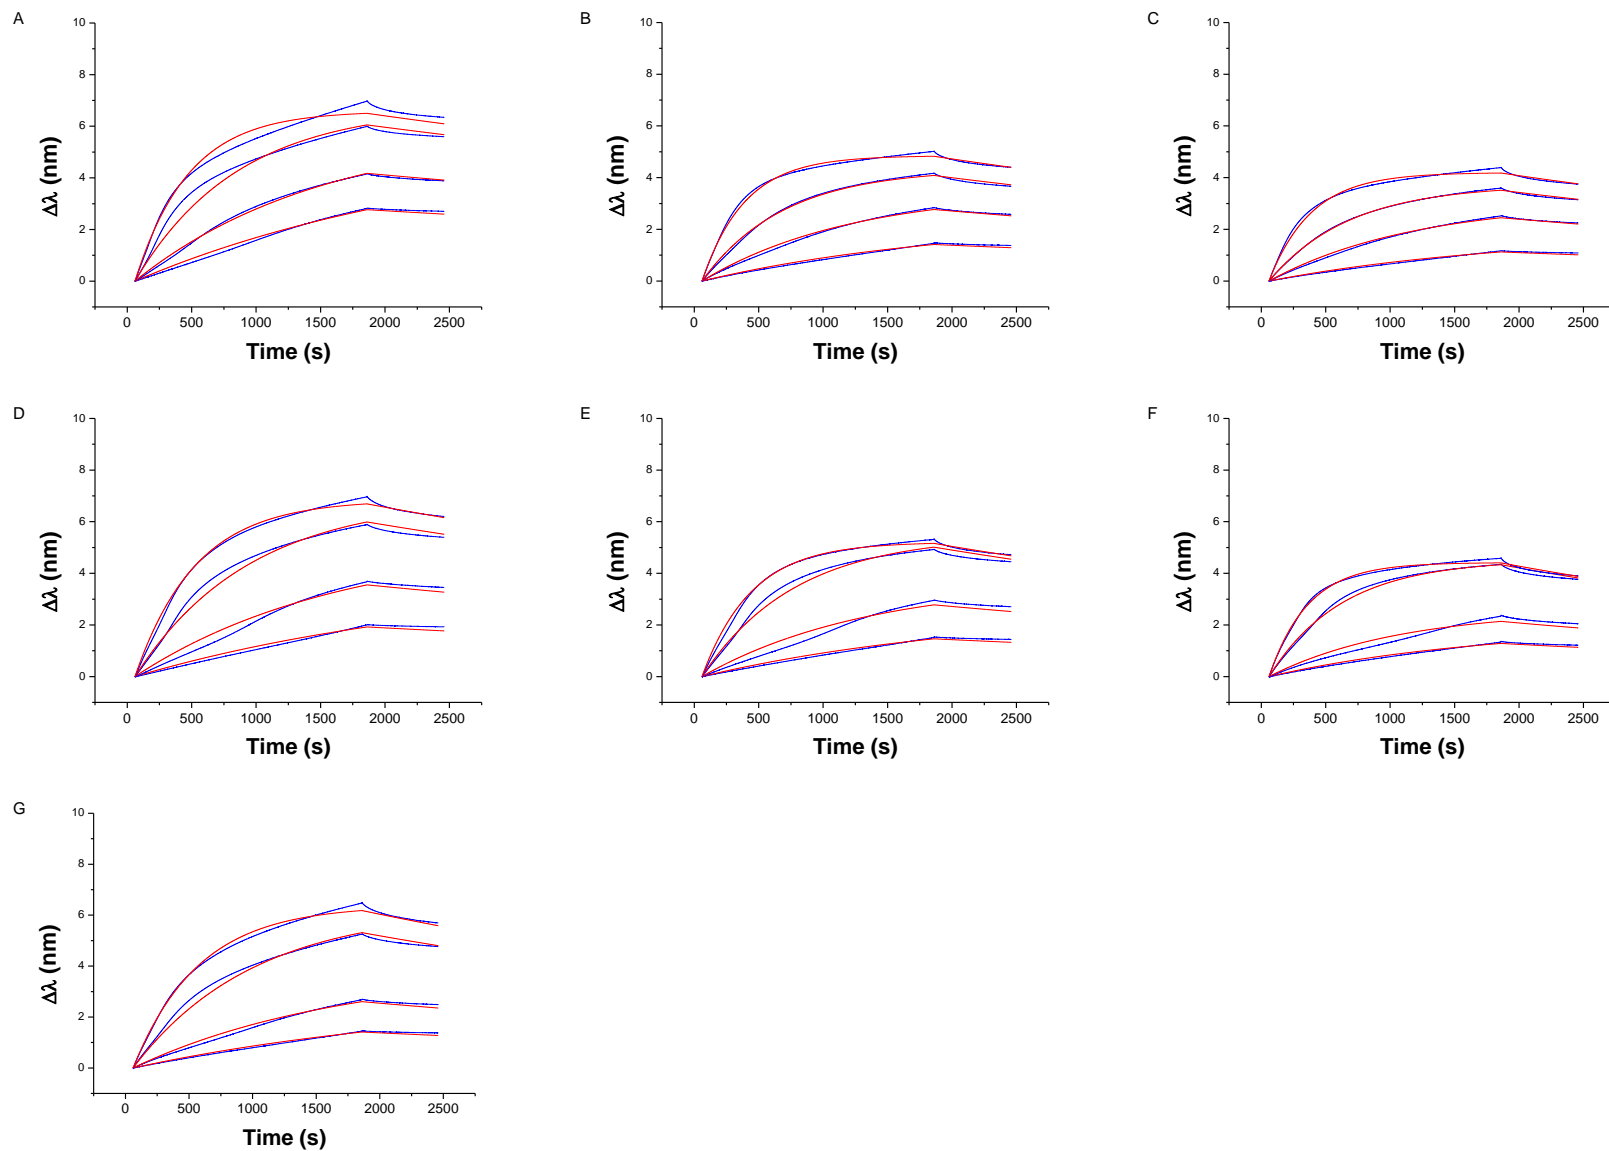

**Figure S10.** BLI analysis of binding of different concentrations of iMab scFv-His<sub>6</sub> (62.5, 125, 250 and 500 nM) to hTeloC-27 (A), hTeloC-3x4 (B), hTeloC 2x6T (C), hTeloC 3x4 (D), hTeloC 2x3 (E), hTeloC 1x3T (F), hTeloC X3 (G) at pH 6 after dipping of the immobilized structured on ammoniac solution at pH 10, 50°C during 10 minutes. Blue lines are experimental curves; red lines are the fits to the 1:1 model.

**Table S2.** Kinetic constants ( $k_{on}$  and  $k_{off}$ ) and calculated dissociation equilibrium constants ( $K_D$ ) for interaction of iMab (scFv-His<sub>6</sub>) with several HTeloC substrates at pH 6 and 20 °C, prior to and after dipping in NH<sub>3</sub> solution (pH 10, 50 °C during 10 min).<sup>a</sup>

| Substrate   | pH 6.0 (prior to dipping in NH <sub>3</sub> solution)          |                                                  |               | pH 6.0 (after dipping in NH <sub>3</sub> solution)             |                                                  |               |
|-------------|----------------------------------------------------------------|--------------------------------------------------|---------------|----------------------------------------------------------------|--------------------------------------------------|---------------|
|             | $k_{on}$<br>(10 <sup>3</sup> M <sup>-1</sup> s <sup>-1</sup> ) | $k_{off}$<br>(10 <sup>-4</sup> s <sup>-1</sup> ) | $K_D$<br>(nM) | $k_{on}$<br>(10 <sup>3</sup> M <sup>-1</sup> s <sup>-1</sup> ) | $k_{off}$<br>(10 <sup>-4</sup> s <sup>-1</sup> ) | $K_D$<br>(nM) |
| hTeloC-27   | 2.7; 4.5                                                       | 1.1; 1.2                                         | 24; 44        | 4.1; 5.1                                                       | 0.5; 1.6                                         | 12; 36        |
| hTeloC-3x4  | 5.9; 7.0                                                       | 1.2; 2.4                                         | 17; 41        | 5.0; 6.4                                                       | 0.9; 2.1                                         | 18; 32        |
| hTeloC-2x6T | 2.8; 3.6                                                       | 1.5; 2.7                                         | 54; 76        | 5.1; 6.5                                                       | 1.1; 2.4                                         | 21; 37        |
| hTeloC-X3   | 2.0; 2.9                                                       | 0.7; 2.2                                         | 35; 73        | 2.9; 4.1                                                       | 1.1; 2.2                                         | 38; 54        |
| hTeloC-3x3  | 4.0; 4.9                                                       | 1.2; 3.3                                         | 31; 67        | 3.6; 4.1                                                       | 0.9; 2.0                                         | 25; 54        |
| hTeloC-2x3  | 5.2; 6.7                                                       | 1.5; 2.2                                         | 22; 42        | 4.2; 5.3                                                       | 1.1; 2.1                                         | 26; 40        |
| hTeloC-1x3T | 8.6; 9.1                                                       | 2.2; 3.7                                         | 25; 41        | 5.8; 6.5                                                       | 1.7; 2.5                                         | 26; 43        |

<sup>a</sup> Data are individual values obtained from two independent measurements.

## Circular dichroism (CD) and gel electrophoresis studies

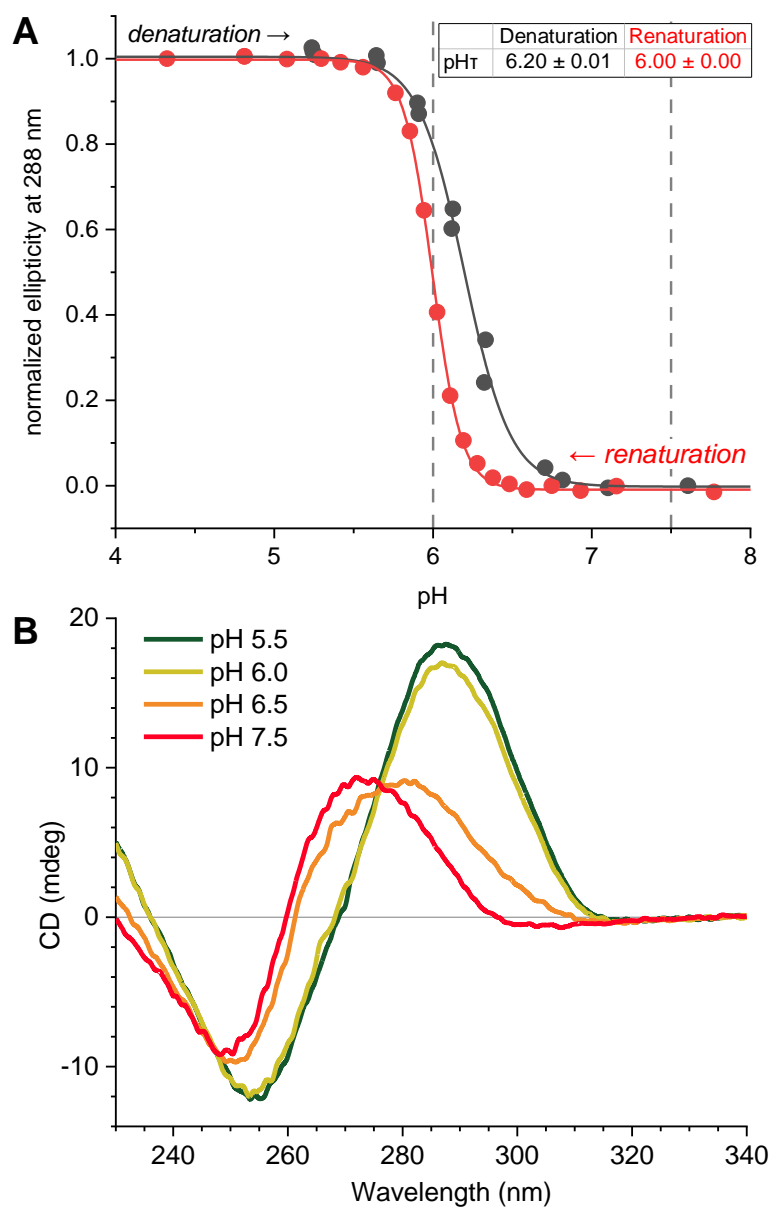

**Figure S11.** (A) pH-dependent denaturation/renaturation curves of hTeloC-27 (2.5  $\mu$ M in 10 mM lithium cacodylate, 100 mM potassium chloride buffer). Titrations were performed as described elsewhere (Boissieras and Granzhan, *Methods Enzymol.* 2024, 695, 233–254). Dashed lines indicate the two conditions (pH 6.0 and 7.5) used in BLI experiments. (B) CD spectra of hTeloC-27 (2.5  $\mu$ M) at pH 5.5, 6.0, 6.5 and 7.5.



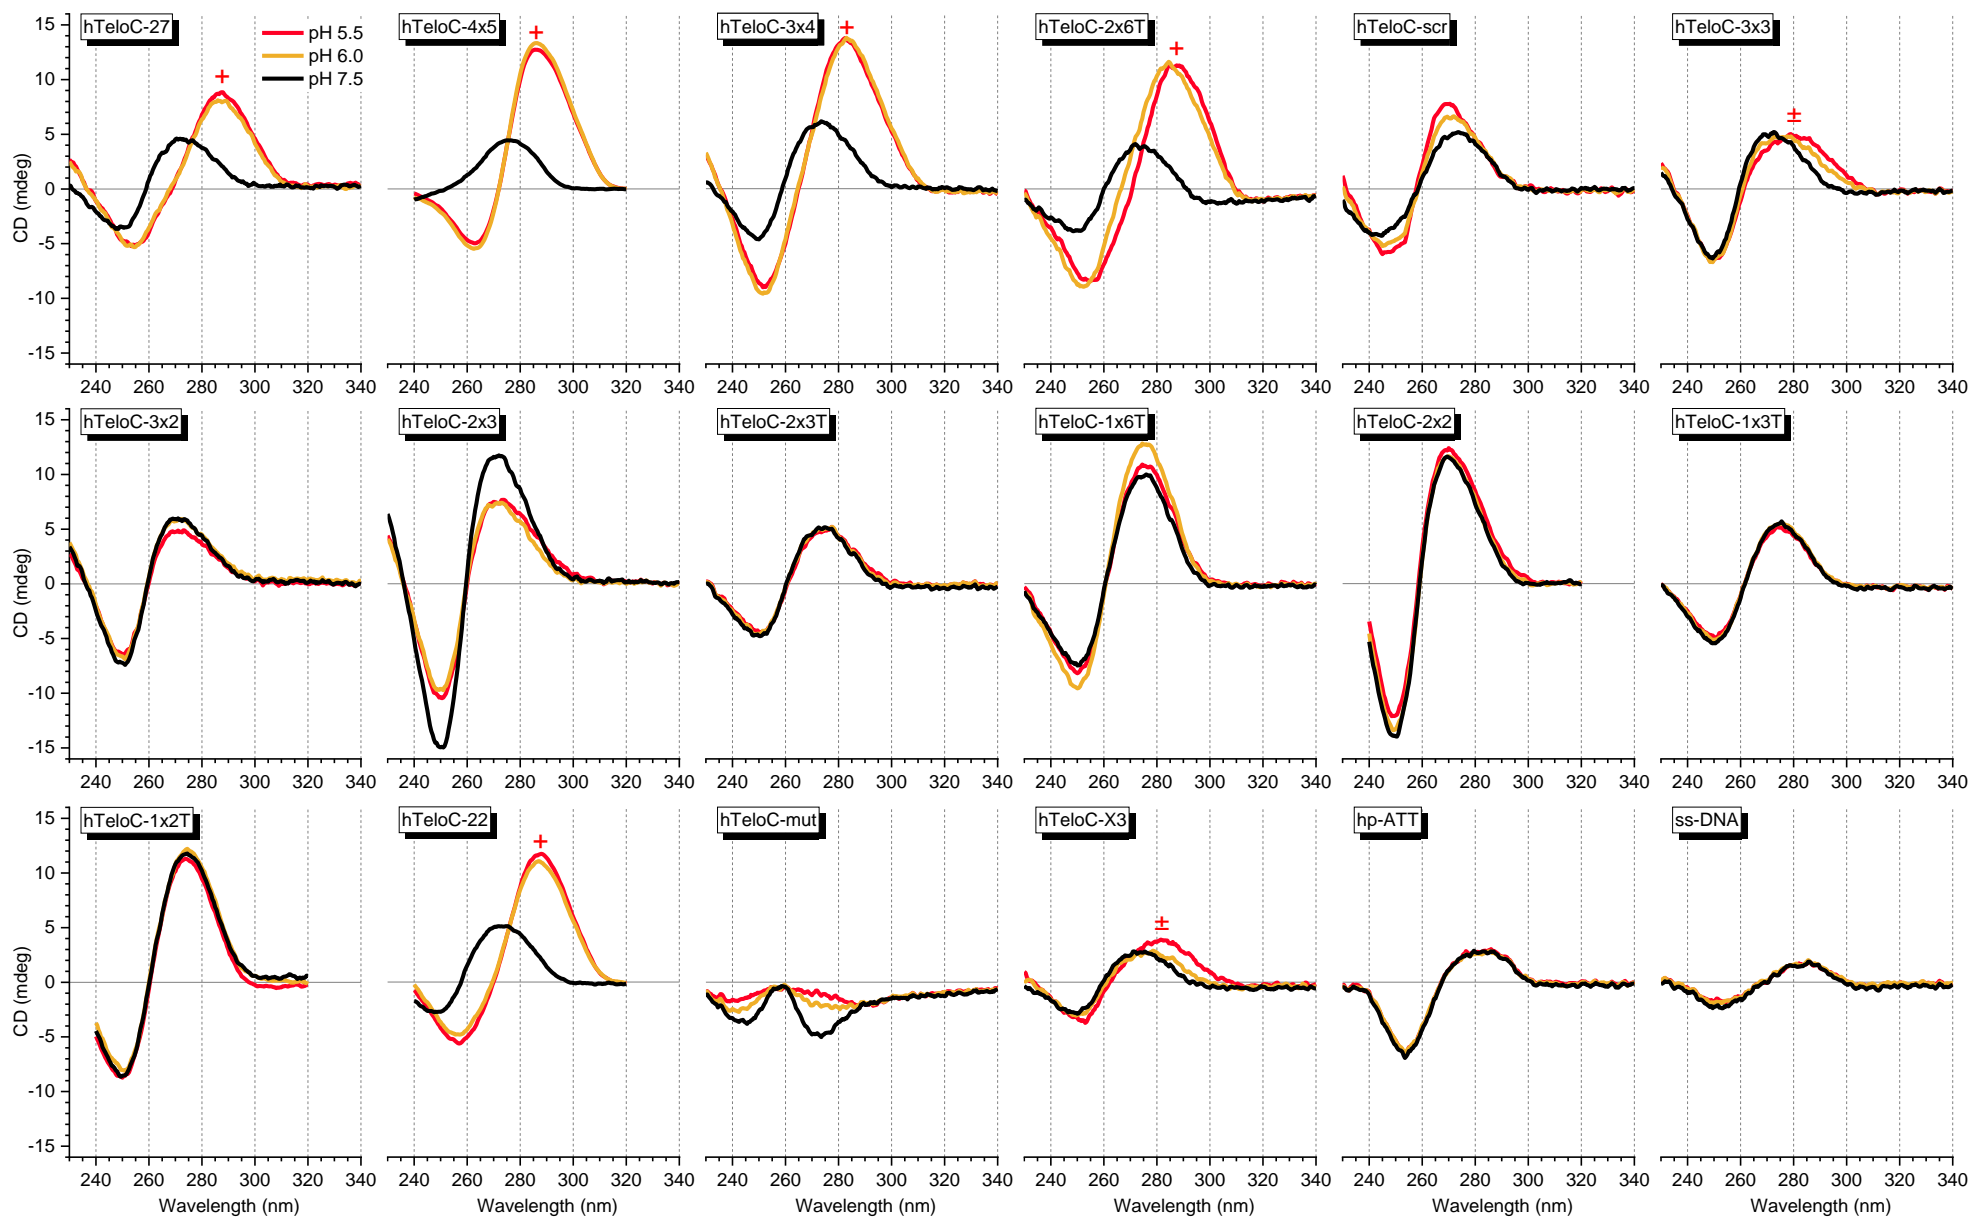

**Figure S12.** CD spectra of the sequences used in this study, obtained at pH 5.5 (red), 6.0 (dark yellow) and 7.5 (black). Oligonucleotide concentration  $c = 2.5 \mu\text{M}$  in all cases. iM-characteristic peaks are labelled with a plus (+) symbol; peaks suggesting partial formation of iMs are labelled with a plus-minus symbol ( $\pm$ ). Note that the peculiar shape of hTeloC-mut spectrum is in agreement with literature data (M. Zeraati *et al.*, *Nature Chem.* **2018**, *10*, 631–637).

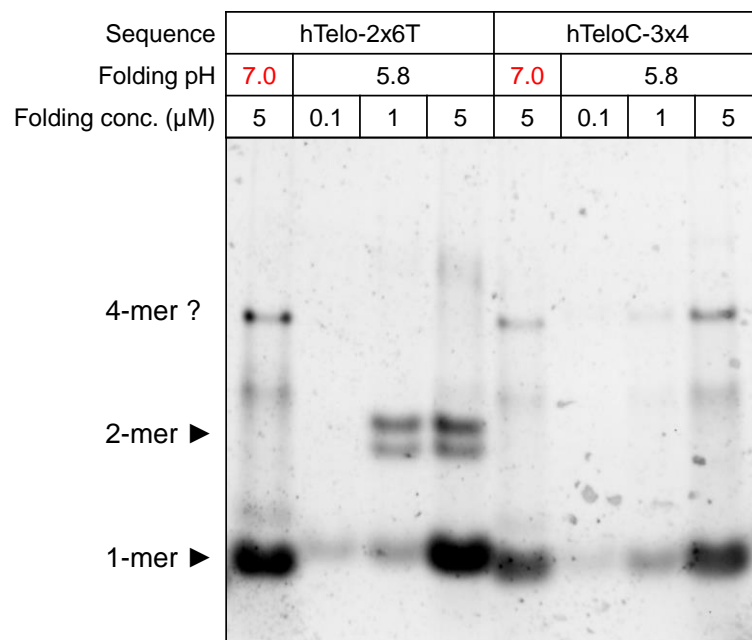

**Figure S13.** Native gel electrophoresis of hTeloC-2x6T and hTeloC-3x4. Oligonucleotides samples (10  $\mu$ L each) were annealed at indicated concentrations for 10 min at 95 °C and then cooled overnight in Tris-AcOH, pH 5.8 or 7.0 (control), supplemented with 2  $\mu$ L of a 6X Ficoll-based loading buffer and migrated on a 20% acrylamide gel with TAE buffer adjusted to pH 5.8, overnight at 4 °C. DNA bands were observed after a 15-min incubation in a 1:100 SYBR Green/TAE mixture in a BioRad GelDoc XR device.

## Bulk-FRET experiments

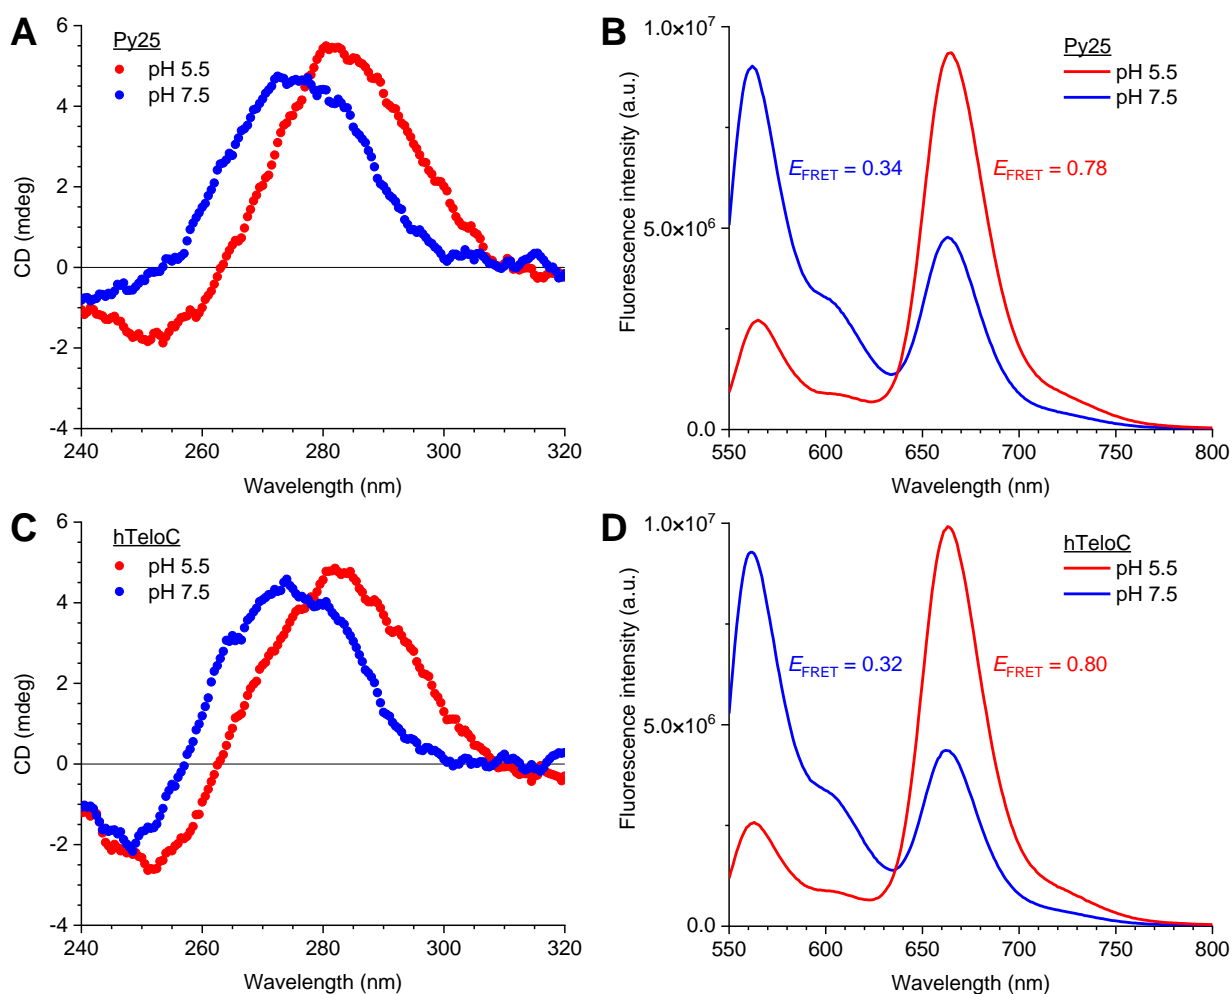

**Figure S14.** Circular dichroism (A, C) and fluorescence emission spectra (B, D) of Cy3-Py25/Cy5-CS (panels A–B) and Cy3-hTeloC/Cy5-CS (panels C–D) substrates (0.5  $\mu\text{M}$  in bulk-FRET buffer), both recorded at pH 5.5 (red dots and lines) and pH 7.5 (blue dots and lines).

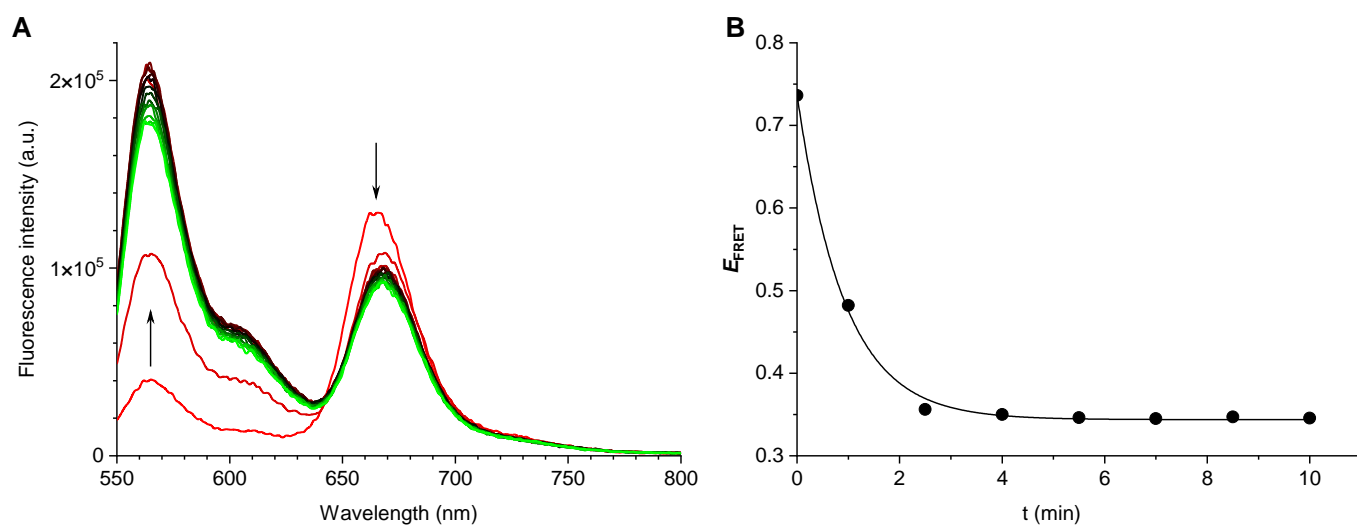

**Figure S15.** Time-dependent variation of fluorescence emission spectra (A) and  $E_{\text{FRET}}$  value (B) of Cy3-Py25/Cy5-CS substrate (4 nM) after addition of recombinant hnRNP K (800 nM) at pH 5.8. Spectra were recorded in ~2-min intervals.

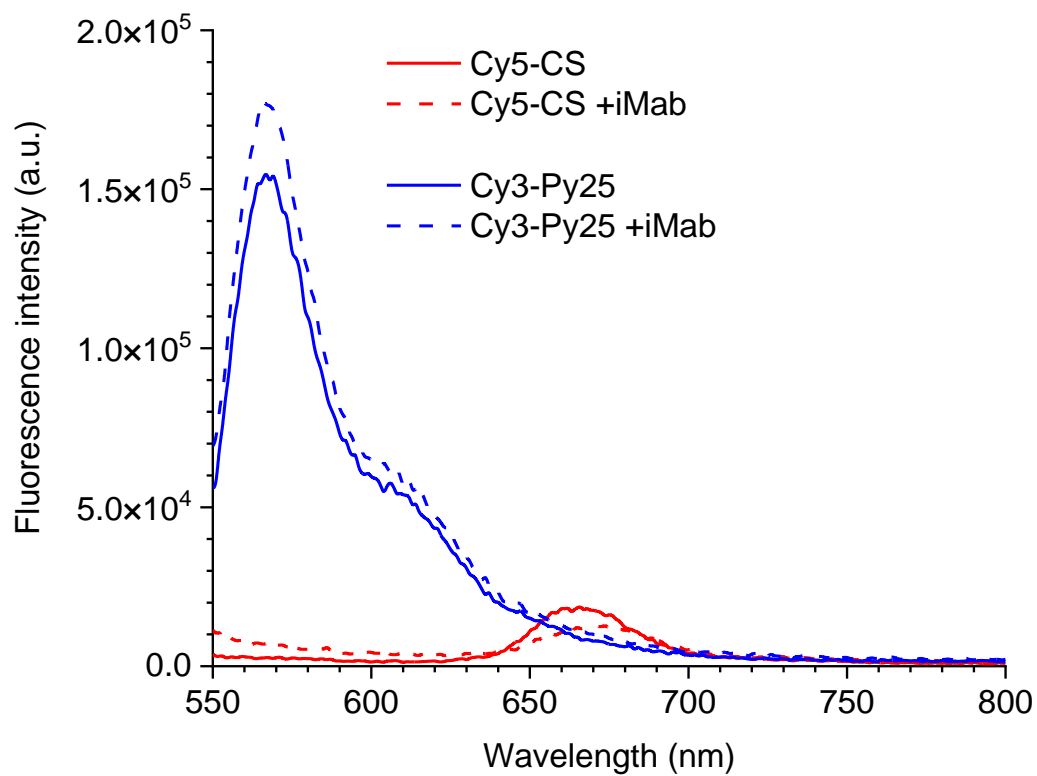

**Figure S16.** Fluorescence emission spectra of Cy3-Py25 (blue) and Cy5-CS (red) strands (4 nM in bulk-FRET buffer, pH 5.8), in the absence (solid lines) and in the presence of 800 nM of iMab (dashed lines). No additional changes were observed after ~1 hour of incubation time.
